# Supplementary material for: Control of osmotic pressure through CO2-capture and release facilitated by the lower critical solution temperature (LCST) phase transition of acylated branched polyethylenimine
Source: Royal Society of Chemistry journal article supplement (doi:10.1039/c6ra00371k), 2016-01-01
Supplement: c6ra00371k1.pdf [file c6ra00371k1.pdf]

## Electronic Supplementary Information for:

# Control of osmotic pressure through CO<sub>2</sub>-capture and release facilitated by lower critical solution temperature (LCST) phase transition of acylated branched polyethylenimine

Authors: Jeongseon Park, Minwoo Noh, Min Keun Chey, Yeongbong Mok, Ji-Hun Seo and Yan Lee\*

### Table of contents:

**Fig. S1.** Synthetic scheme of Bu-PEI (a) and Bu-Val-PEI (b).

**Fig. S2.** <sup>1</sup>H NMR spectra of Bu-PEI (a) and Bu-Val-PEI (b).

**Fig. S3.** CO<sub>2</sub> release rate of (a) *b*-PEI and Bu-PEI solutions at the amine concentration of 3.4 m at 70°C, (b) *b*-PEI, Bu-PEI and Bu-Val-PEI solutions at the amine concentration of 1.7 m at 40°C.

**Fig. S4.** Osmotic flux (a) from NaCl solutions to a *b*-PEI solution (amine concentration: 3.4 m) at 25°C and (b) from the *b*-PEI solution to NaCl solutions at 70°C. Osmotic flux (c) from NaCl solutions to a *b*-PEI solution (amine concentration: 1.7 m) at 15°C and (d) from the *b*-PEI solution to NaCl solutions at 40°C. Osmotic flux (e) from NaCl solutions to a Bu-PEI solution (amine concentration: 1.7 m) at 15°C and (f) from the Bu-PEI solution to NaCl solutions at 40°C. CO<sub>2</sub>-free and CO<sub>2</sub>-saturated conditions are represented as white and grey bars, respectively. Each error bar means the standard deviation of three measurements.

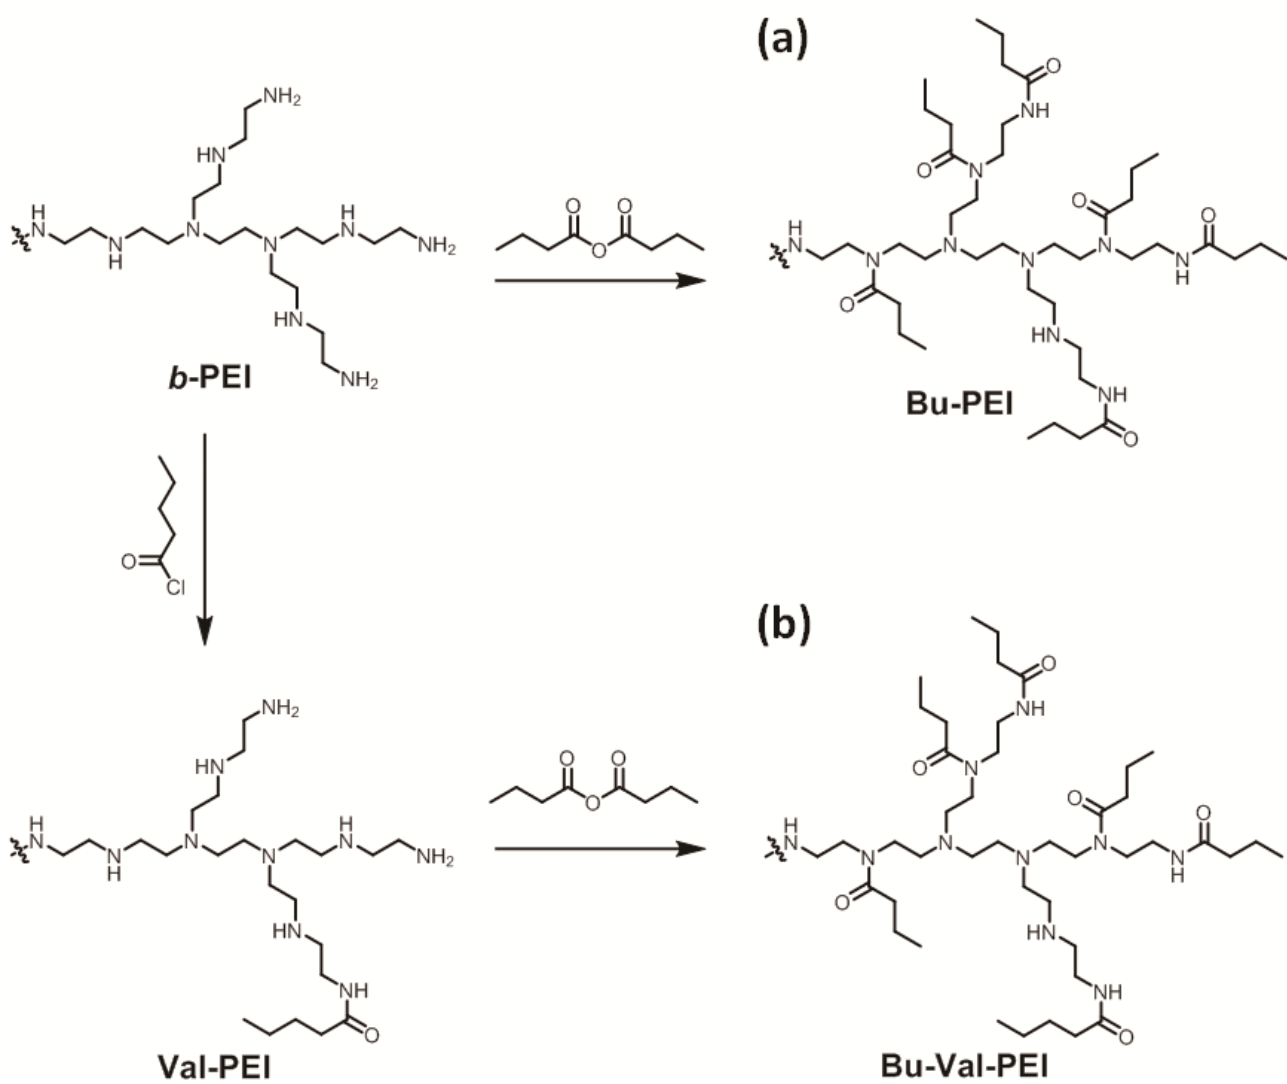

**Fig. S1.** The synthetic scheme of Bu-PEI (a) and Bu-Val-PEI (b).

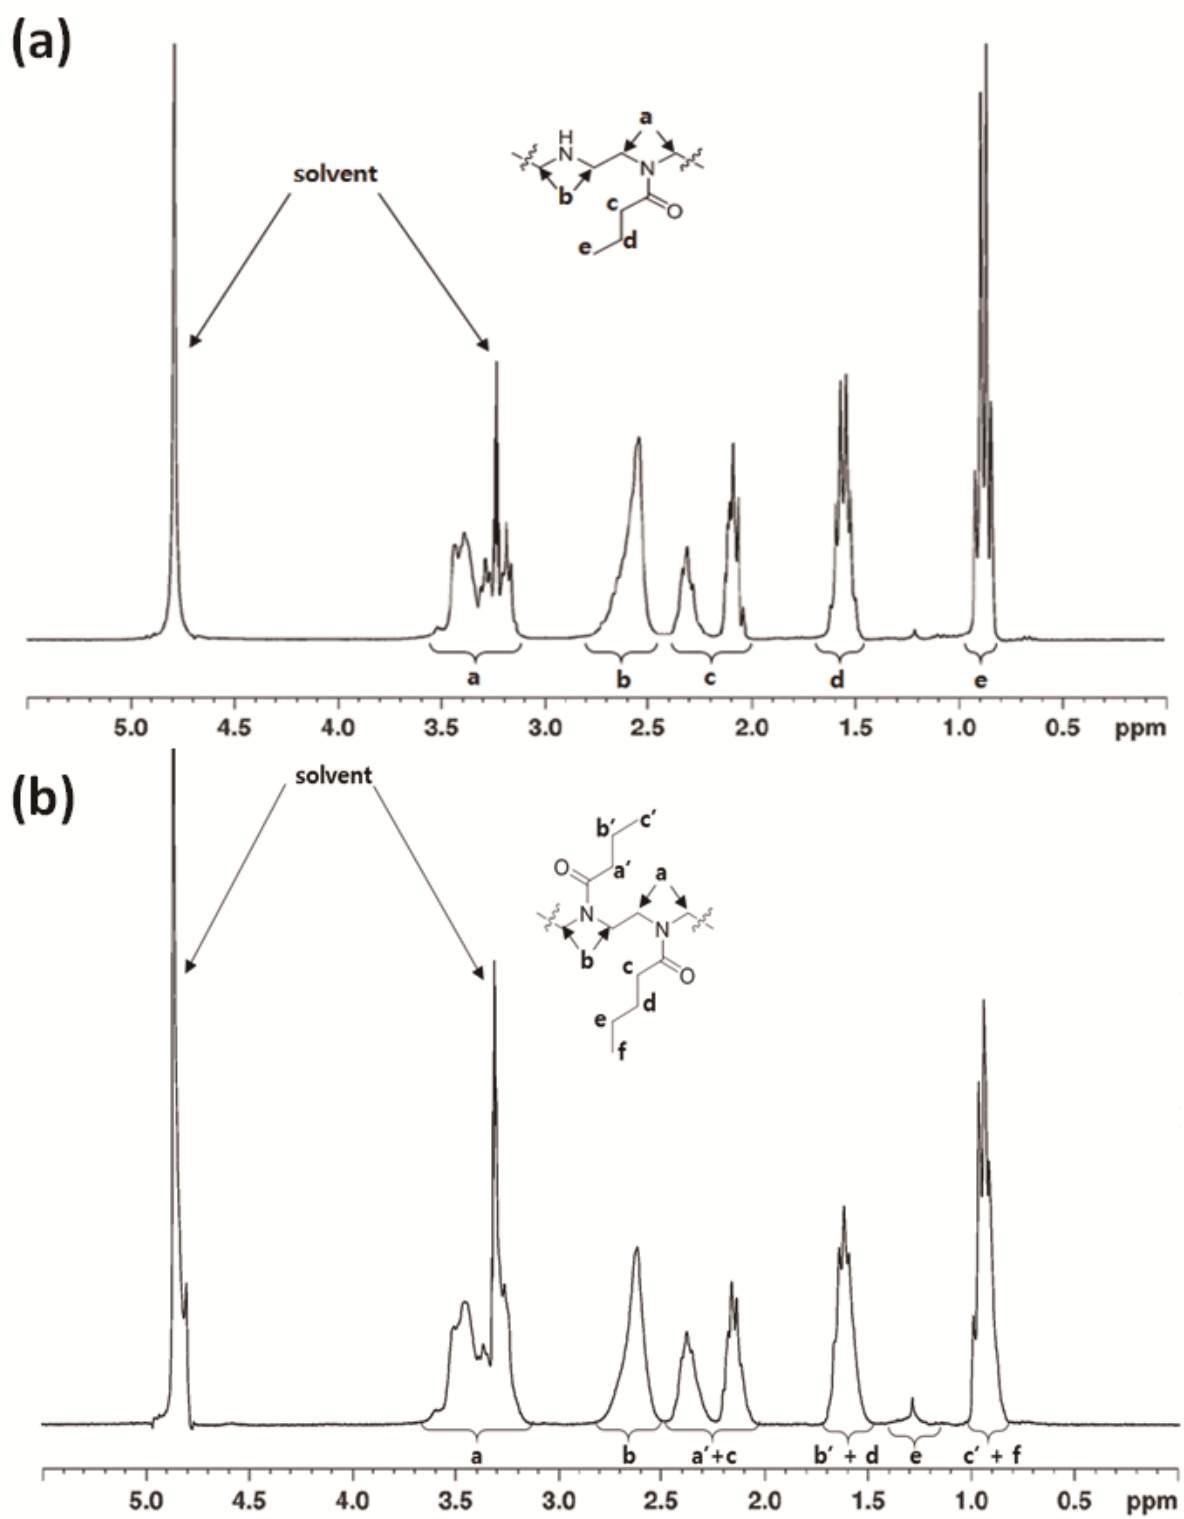

Fig. S2.  $^1\text{H}$  NMR spectra of Bu-PEI (a) and Bu-Val-PEI (b).

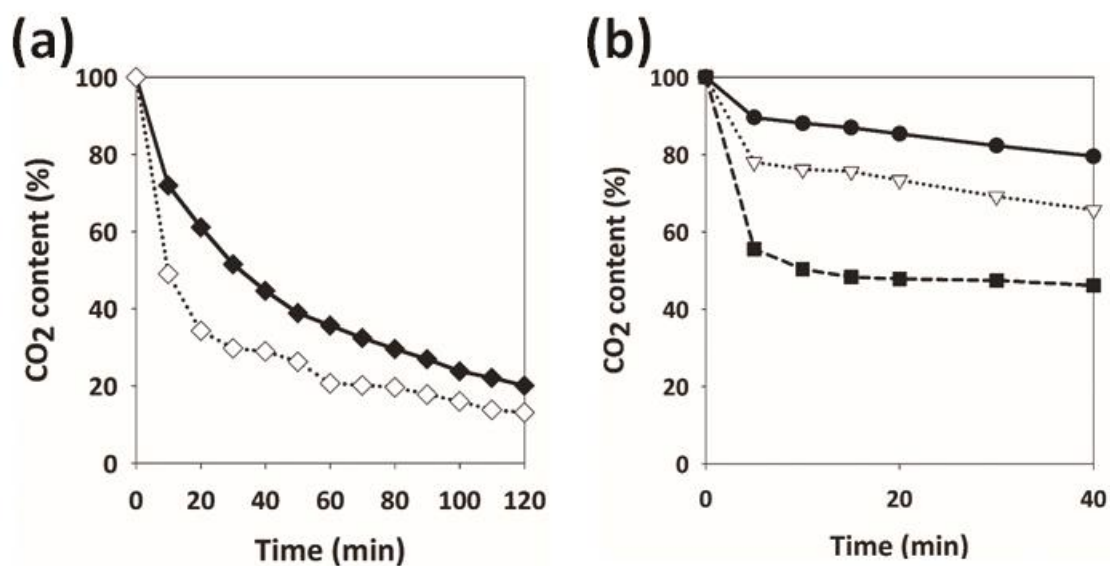

**Fig. S3.** CO<sub>2</sub> release rate of (a) *b*-PEI and Bu-PEI solutions at the amine concentration of 3.4 m at 70°C, (b) *b*-PEI, Bu-PEI and Bu-Val-PEI solutions at the amine concentration of 1.7 m at 40°C.

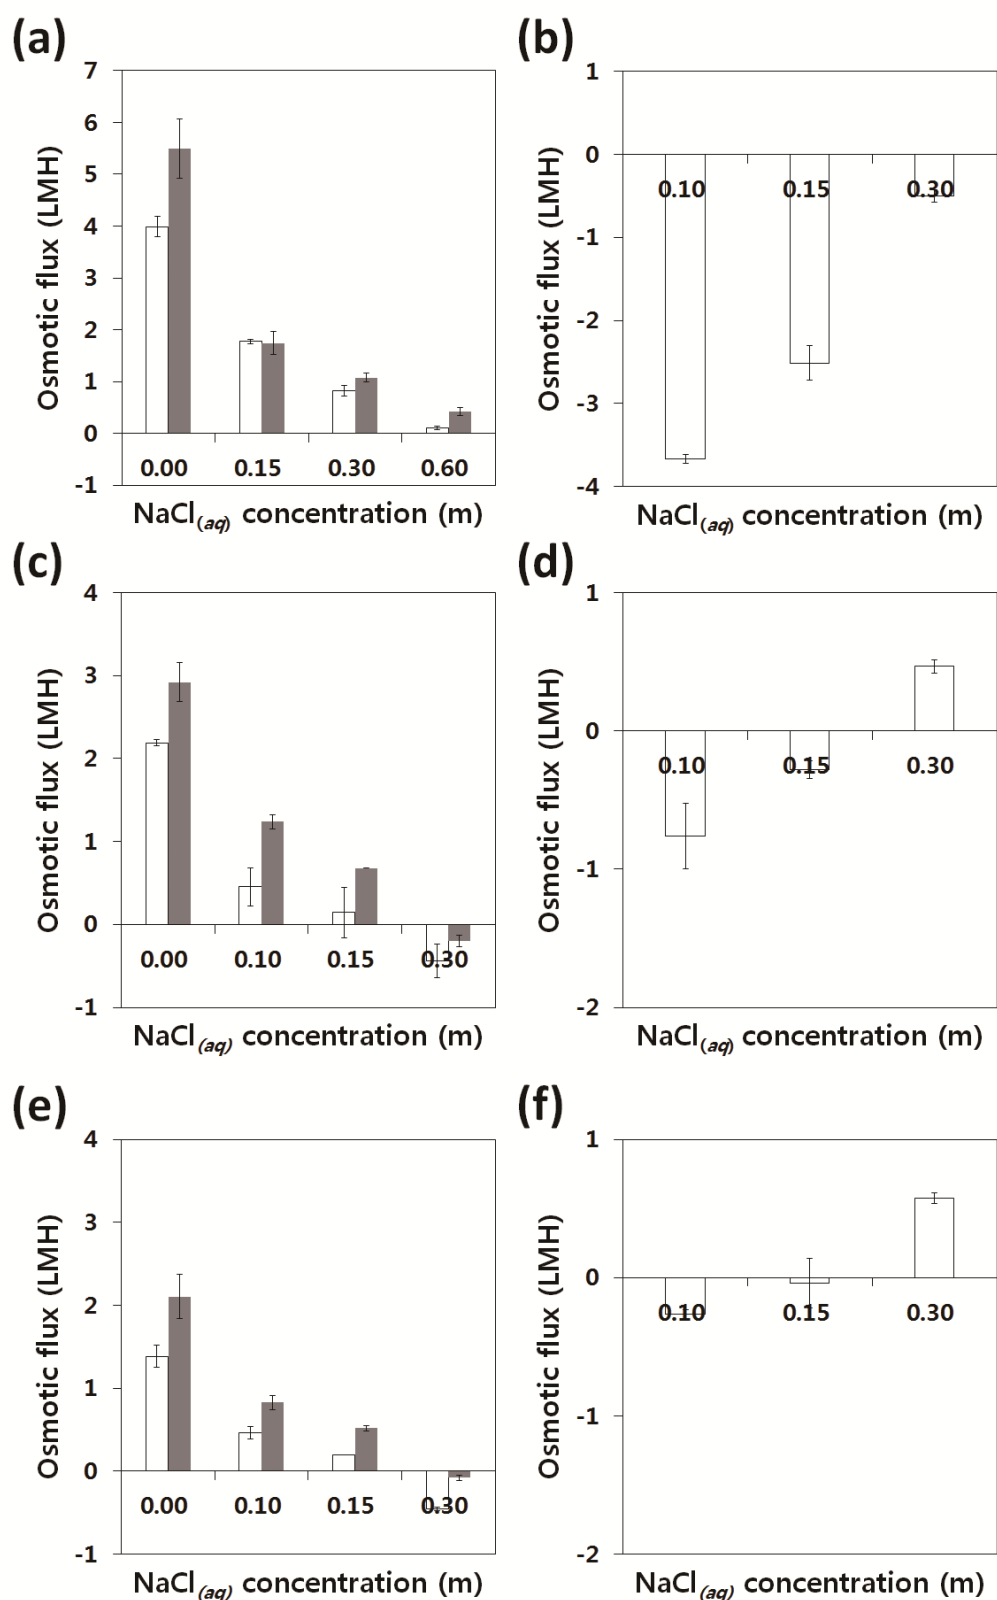

**Fig. S4.** Osmotic flux (a) from NaCl solutions to a *b*-PEI solution (amine concentration: 3.4 m) at 25°C and (b) from the *b*-PEI solution to NaCl solutions at 70°C. Osmotic flux (c) from NaCl solutions to a *b*-PEI solution (amine concentration: 1.7 m) at 15°C and (d) from the *b*-PEI solution to NaCl solutions at 40°C. Osmotic flux (e) from NaCl solutions to a Bu-PEI solution (amine concentration: 1.7 m) at 15°C and (f) from the Bu-PEI solution to NaCl solutions at 40°C. CO<sub>2</sub>-free and CO<sub>2</sub>-saturated conditions are represented as white and grey bars, respectively. Each error bar means the standard deviation of three measurements.
